# Supplementary material
Source: publisher figshare collection journal article supplement (https://sage.figshare.com/ndownloader/files/18725042)
Supplement: Supplementary file 1 [file 18725042]

Appendix

Interview protocol

**Background Information**

1. Adult-Can you tell me your role/relationship with the school and a bit about your expectations for students after they finish high school?

Student-Can you tell me your age, what grade you are in, and a bit about your goals after you finish high school?

**Developing college culture and college readiness**

2. What do you feel are the school’s expectations for students once they finish high school?

a. How are these expectations conveyed, communicated?

3. Can you tell me about what you think it takes for a student/you to be ready for college?

4. Can you tell me about how the school promotes or helps students to be ready for college?

5. How often is college discussed or emphasized in school, by students, and staff?

a. What is the school’s responsibility in having these discussions and providing support for college?

6. How is the entire school community involved in creating a college culture on the campus?

a. How are school staff and families involved?

b. What means of communication or gatherings take place?

7. Where is college info and resources available on the campus?

a. Is it integrated in courses and/or accessible to all?

8. What role do school counselors play in providing college information and assistance?

9. Are students/you aware of the exams required to get into college (PSAT, SAT, etc.)?

a. Are there SAT/ACT prep sessions or any other programs offered to help with these exams?

10. Are students/you aware of how to apply for financial aid or to complete college applications?

11. What kinds of partnerships/relationships does the school have with universities/colleges?

12. Academically, what types of courses or programs (AP/IB/Dual enrollment) are offered/are you

taking?

a. Are courses challenging and help students/you develop as critical thinkers?

b. To what degree is technology integrated in courses?

13. Are students/you aware of graduation requirements? How do students/you get informed about that?

14. Are students/you taught specific study skills? How so?

15. What is the availability of teachers or other academic supports outside of class? (ex. study hall, tutoring)

16. What type of teaching/learning is common in classrooms? (ex. collaborative, individual, discussion, lecture, open ended questions)

17. How ready are students/you for college based on what the school has provided?

18. In what ways can the school improve in preparing students for college?

19. Is there anything else you’d like to add or any questions you have?
